# Supplementary material for: Optical Properties of Polyisocyanurate–Polyurethane Aerogels: Study of the Scattering Mechanisms
Source: MDPI journal article supplement (doi:10.3390/nano12091522), 2022-04-30
Supplement: s1 [file s1]

# Optical Properties of Polyisocyanurate–Polyurethane Aerogels: Study of the Scattering Mechanisms

Beatriz Merillas <sup>1,\*</sup>, Judith Martín-de León <sup>1</sup>, Fernando Villafañe <sup>2</sup> and Miguel Ángel Rodríguez-Pérez <sup>1,3</sup>

<sup>1</sup> Cellular Materials Laboratory (CellMat), Condensed Matter Physics Department, Faculty of Science, University of Valladolid, Campus Miguel Delibes, 47011 Valladolid, Spain; jmadeleon@fmc.uva.es (J.M.-d.L.); marrod@fmc.uva.es (M.Á.R.-P.)

<sup>2</sup> GIR MIOMeT-IU Cinquima-Química Inorgánica. Faculty of Science, University of Valladolid, Campus Miguel Delibes, 47011 Valladolid, Spain; fernando.villafane@uva.es

<sup>3</sup> BioEcoUVA Research Institute on Bioeconomy, University of Valladolid, 47011 Valladolid, Spain

\* Correspondence: b.merillas@fmc.uva.es; Tel.: +34-983423194

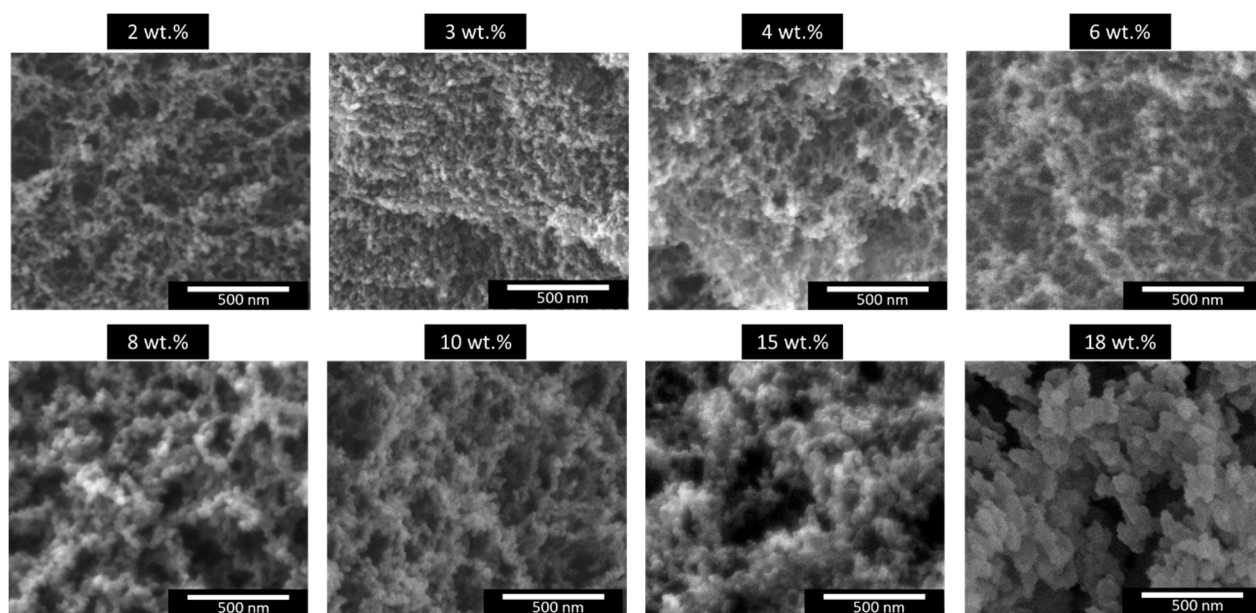

**Figure S1.** Scanning electron micrographs for all the samples under study at a higher magnification.

**Table S1.** Parameters obtained by nitrogen sorption measurements: pore volume and specific surface area.

| Catalyst amount (wt.%) | V pore (cm <sup>3</sup> /g) | S (BET) m <sup>2</sup> /g |
|------------------------|-----------------------------|---------------------------|
| 2                      | 6.25                        | 294.11                    |
| 3                      | 5.19                        | 288.15                    |
| 4                      | 5.63                        | 242.09                    |
| 6                      | 6.24                        | 274.12                    |
| 8                      | 6.79                        | 197.10                    |
| 10                     | 7.88                        | 224.28                    |
| 15                     | 9.04                        | 145.21                    |
| 18                     | 8.97                        | 49.70                     |

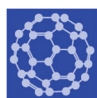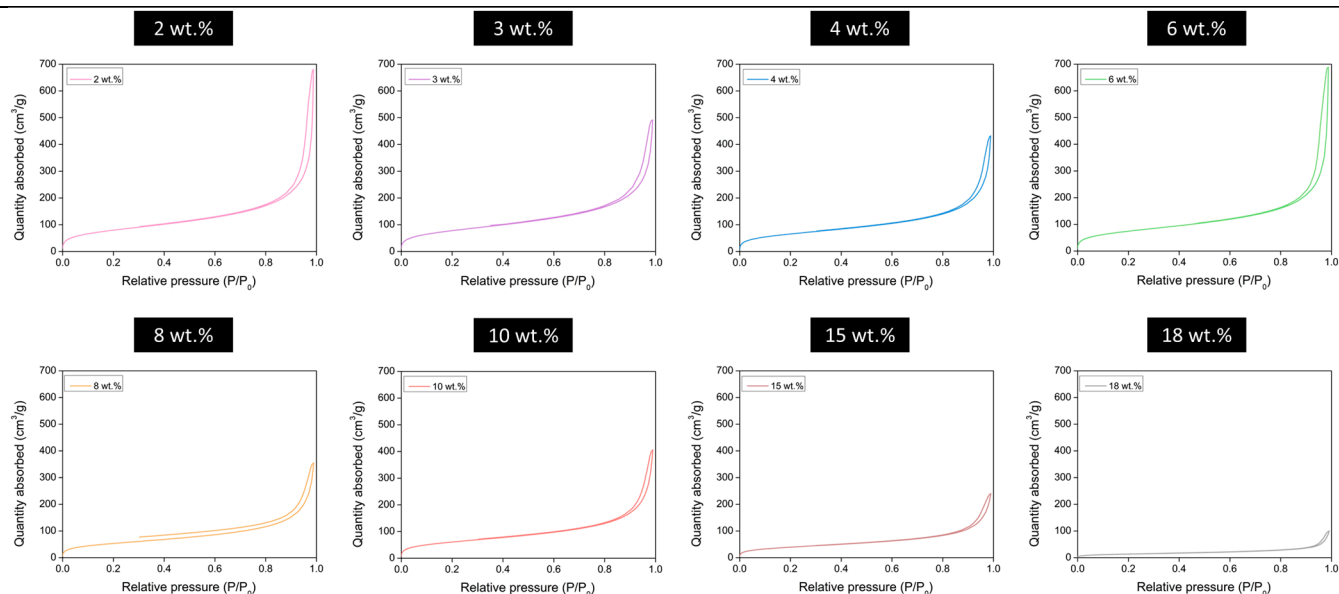

**Figure S2.** Nitrogen adsorption-desorption curves for all the PUR-PIR aerogels.

**Table S2.** Adjusted  $R^2$  values for the fitting of  $-\ln(T)$  as a function of thickness for all the laser wavelengths and all samples.

| wt. % | $R^2$  |        |        |
|-------|--------|--------|--------|
|       | 450 nm | 532 nm | 650 nm |
| 2     | 0.993  | 0.998  | 0.993  |
| 3     | 0.989  | 0.993  | 0.994  |
| 4     | 0.991  | 0.996  | 0.997  |
| 6     | 0.978  | 0.997  | 0.963  |
| 8     | 0.957  | 0.989  | 0.989  |
| 10    | 0.936  | 0.972  | 0.976  |
| 15    | 0.919  | 0.981  | 0.992  |
| 18    | 0.904  | 0.785  | 0.985  |

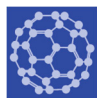**Table S3.** Numerical values for the transmittance at three different laser wavelengths for samples of 1 mm thickness.

| wt. % | 450 nm | 532 nm | 650 nm |
|-------|--------|--------|--------|
| 2     | 0.513  | 0.709  | 0.835  |
| 3     | 0.489  | 0.698  | 0.774  |
| 4     | 0.379  | 0.591  | 0.686  |
| 6     | 0.221  | 0.474  | 0.503  |
| 8     | 0.140  | 0.342  | 0.428  |
| 10    | 0.139  | 0.338  | 0.427  |
| 15    | 0.039  | 0.087  | 0.070  |
| 18    | 0.014  | 0.007  | 0.033  |

**Table S4.** Refraction index for the aerogel samples calculated by the Clausius-Mosotti equation.

| wt. % | Refraction index |
|-------|------------------|
| 2     | 1.047            |
| 3     | 1.062            |
| 4     | 1.052            |
| 6     | 1.052            |
| 8     | 1.043            |
| 10    | 1.052            |
| 15    | 1.039            |
| 18    | 1.038            |

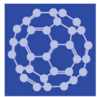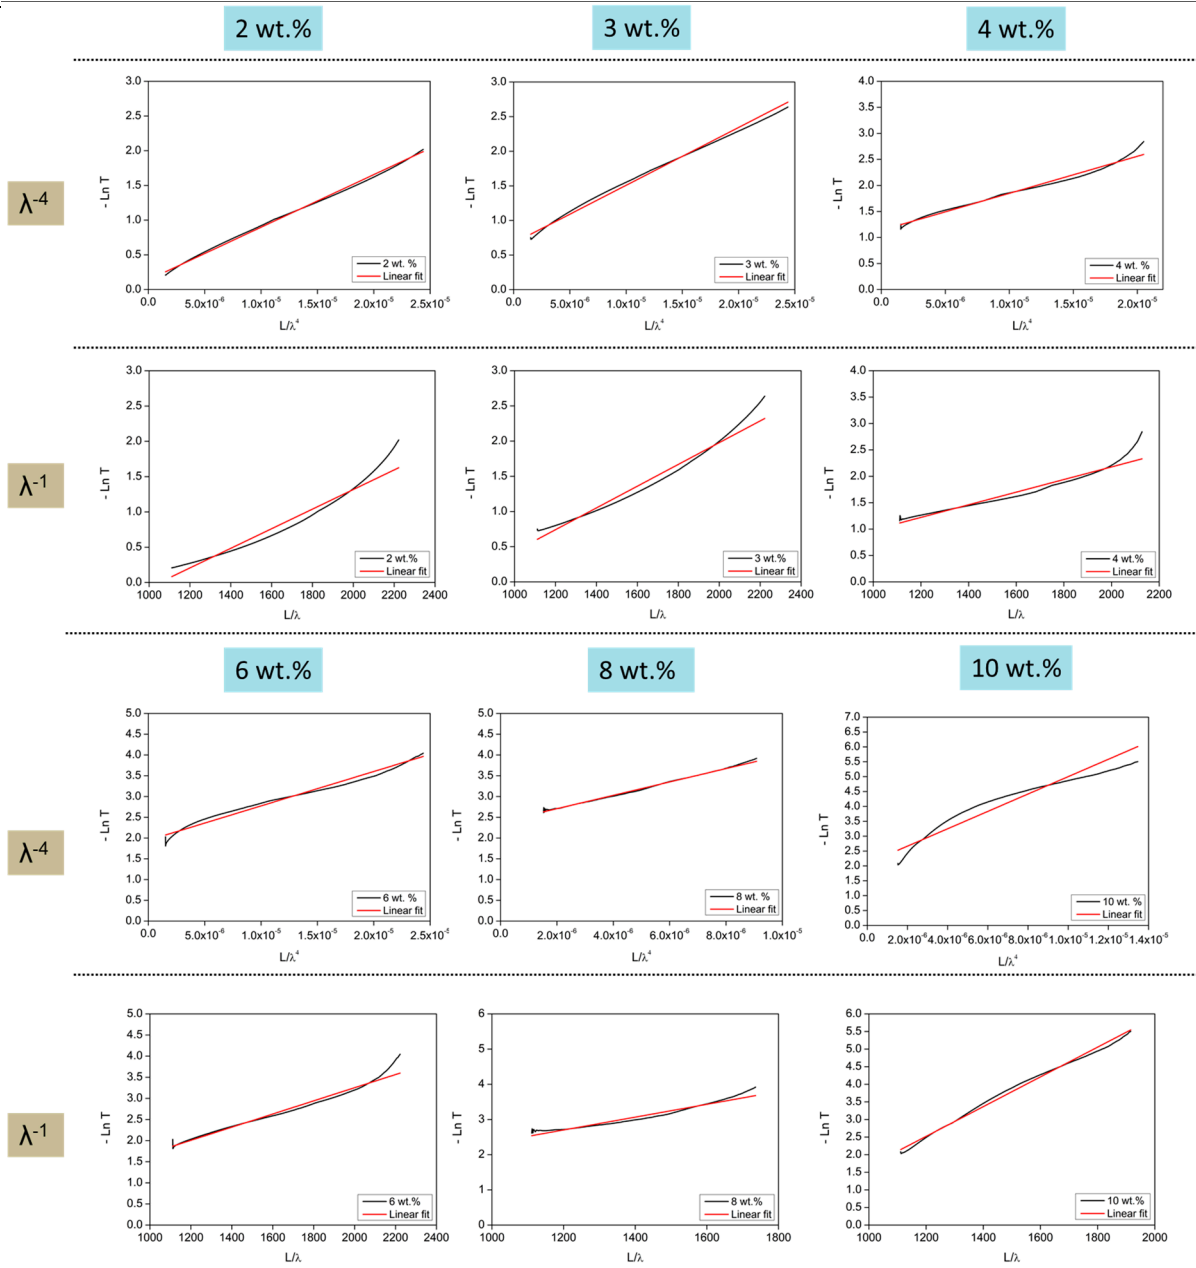

**Figure S3.**  $-\ln(T)$  as a function of  $L/\lambda^4$  or  $L/\lambda$  for all the aerogel samples and values of the adjusted  $R^2$  for the linear fitting.

**Table S5.** Adjusted  $R^2$  values for the fitting of  $-\ln(T)$  as a function of  $L/\lambda^4$  or  $L/\lambda$ .

|       | $\lambda^{-4}$ | $\lambda^{-1}$ |
|-------|----------------|----------------|
| wt. % | $R^2$          | $R^2$          |
| 2     | 0.999          | 0.968          |
| 3     | 0.997          | 0.980          |
| 4     | 0.987          | 0.940          |
| 6     | 0.992          | 0.964          |
| 8     | 0.996          | 0.968          |
| 10    | 0.977          | 0.991          |
